# Supplementary material
Source: PubMed Central journal article supplement (PMC3037546)
Supplement: NIHMS268115-supplement-1_si_001.pdf [file NIHMS268115-supplement-1_si_001.pdf]

## The Role of Frozen Spins in the Exchange Anisotropy of Core–Shell Fe@Fe<sub>3</sub>O<sub>4</sub> Nanoparticles: Supporting Information

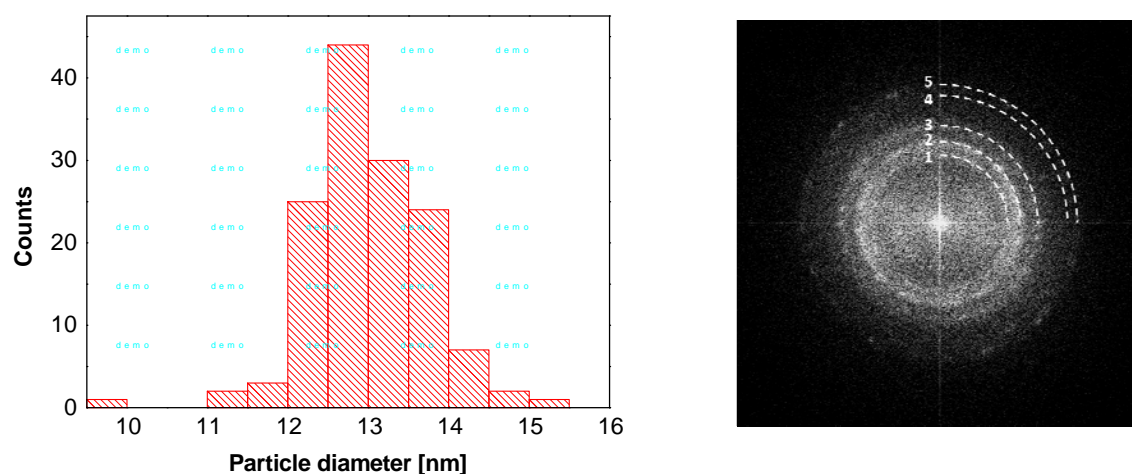

**Figure S1.** (Left) Statistical analysis of particle size ( $13.0 \pm 0.7$  nm,  $N=XXX$ ). (Right and bottom) electron diffraction analysis of Fe@Fe<sub>3</sub>O<sub>4</sub> core-shell nanoparticles, derived by FFT of the HRTEM image in Figure 1 (inset).

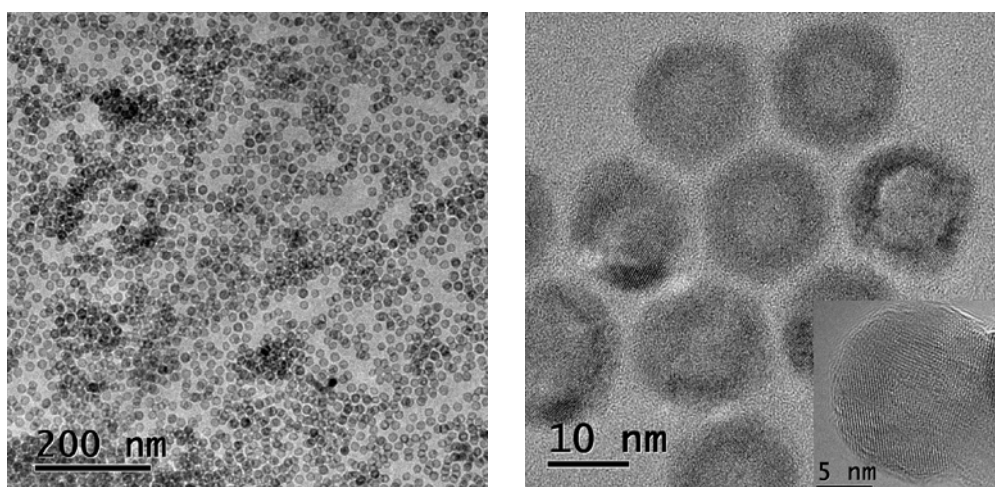

**Figure S2.** (Left) TEM image (Titan F-30, 300 kV) showing monodispersity of Fe<sub>3</sub>O<sub>4</sub> hollow nanoparticles. (Right) HRTEM images (Titan F-30, 300 kV) of the hollow nanoparticles.

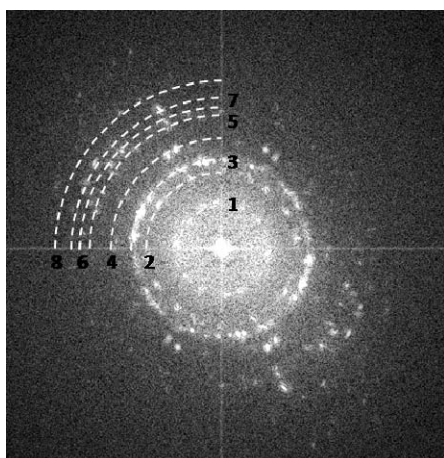

| Ring # | Measured d-spacing (nm) | d-spacing (nm) JCPDS 79-0418 | (hkl) |
|--------|-------------------------|------------------------------|-------|
| 1      | 0.49                    | 0.4848                       | 111   |
| 2      | 0.29                    | 0.2969                       | 220   |
| 3      | 0.25                    | 0.2532                       | 311   |
| 4      | 0.21                    | 0.2099                       | 400   |
| 5      | 0.17                    | 0.1714                       | 422   |
| 6      | 0.16                    | 0.1616                       | 333   |
| 7      | 0.15                    | 0.1484                       | 440   |
| 8      | 0.13                    | 0.1327                       | 620   |

**Figure S3.** Electron diffraction analysis of hollow Fe<sub>3</sub>O<sub>4</sub> nanoparticles, using the FFT of a HRTEM image (Figure S2, inset).

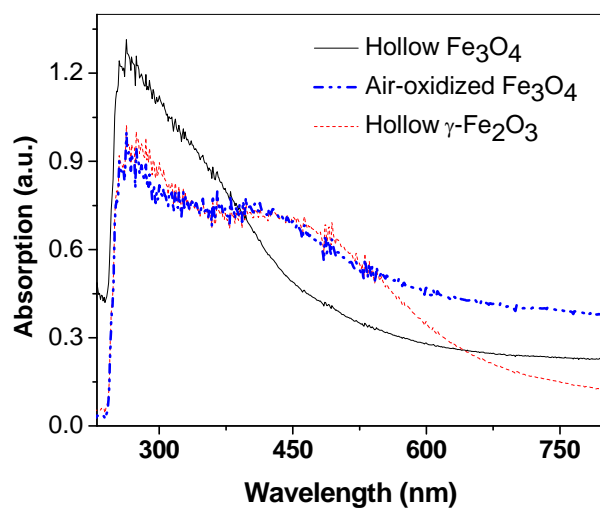

**Figure S4.** Optical absorption spectra of freshly prepared hollow Fe<sub>3</sub>O<sub>4</sub> nanoparticles, by oxidation with (CH<sub>3</sub>)<sub>3</sub>NO (—), (ii) hollow iron-oxide nanoparticles prepared by oxidation in air (···), and hollow  $\gamma$ -Fe<sub>2</sub>O<sub>3</sub> nanoparticles prepared according to Ref. 16 (---).

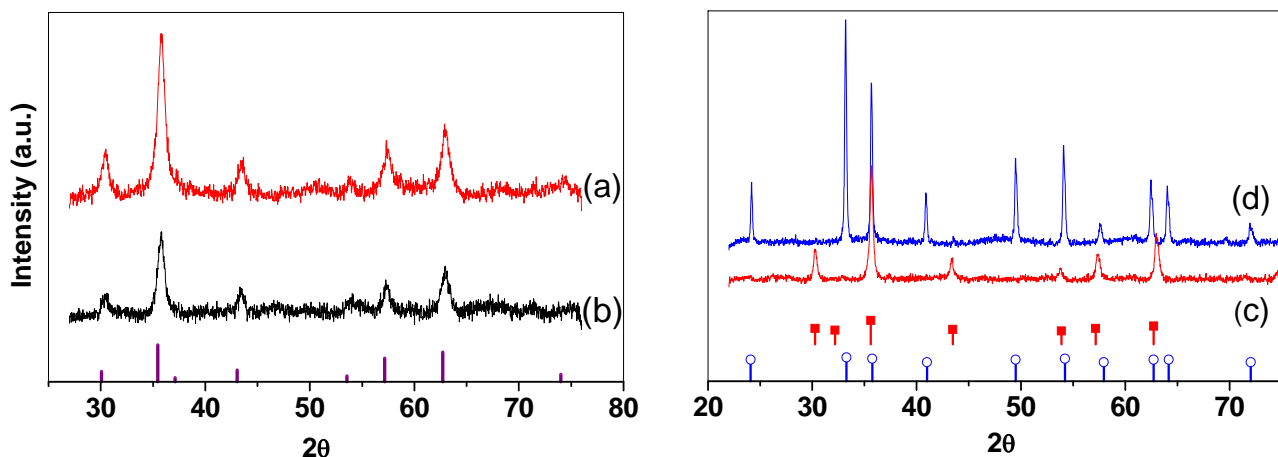

**Figure S5.** (Left) X-ray diffraction spectra of hollow  $\text{Fe}_3\text{O}_4$  nanoparticles, before (a) and after (b) heating at  $500\text{ }^\circ\text{C}$ . (Right) (c) X-ray diffraction spectra of  $\gamma\text{-Fe}_2\text{O}_3$  nanoparticles; (d) hollow iron-oxide nanoparticles with conversion to  $\alpha\text{-Fe}_2\text{O}_3$ , after heating at  $500\text{ }^\circ\text{C}$ .

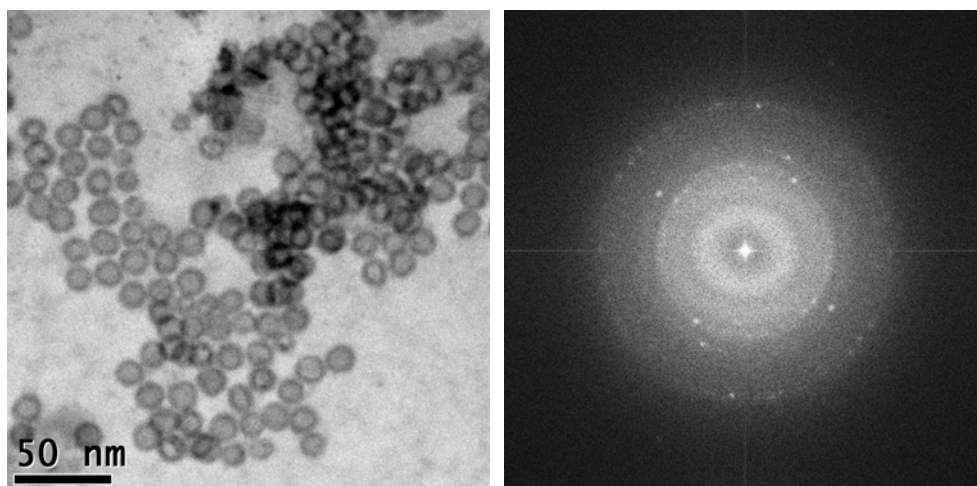

**Figure S6.** TEM image (Titan F-30, 300 kV) and corresponding FFT of aged nanoparticles after annealing at  $400\text{ }^\circ\text{C}$  in argon, indicating a solid-to-hollow transition.
